# Supplementary material for: <span data-contrast="none">Post-COVID-19 Condition Patients’ Utilisation of Healthcare Resources after Implementation of an Integrated Care Unit: A Retrospective and Case-Control Observational Study <span data-ccp-props="{">
Source: Preprints.org preprint supplement (doi:10.20944/preprints202402.0870.v1), 2024-02-16
Supplement: Supplementary file 1 [file supplementary]

**Supplementary material:**

| **Group** | | **Prices** |
| --- | --- | --- |
| Primary care | | |
|  | General practitioner | 50·00 € |
|  | Nursery | 35·00 € |
|  | Home visits | 65·00 € |
|  | Emergency care centres | 120·00 € |
|  | Sexual and reproductive care | 50·00 € |
|  | Others (mental health, administrative, extractions) | 30·00 € |
| Hospital visits | | |
|  | First visit | 171·00 € |
|  | Successive and other visits | 80·00 € |
| Hospitalisations | | |
|  | General | 674·00 € |
|  | Surgery | 817·00 € |
|  | Home hospitalisations | 477·00 € |
| Emergencies | | 248·00 € |
| Procedures | | See Supplementary Table 2 |

**Supplementary Table 1: Description of costs for healthcare resources**. Costs were priced as per [14], with some services in primary care (Emergency care centres, Sexual and reproductive care, Others) being an average. Procedures were included in Supplementary Table 2.

| **Code** | **Name** | **Price** | **Code** | **Name** | **Price** |
| --- | --- | --- | --- | --- | --- |
| RA00001 | Chest X-ray 1-2 projections | 15·00 € | PD00118 | Electrocardiogram (ECG or EKG) | 21·00 € |
| PD00642 | Liquid-based Gynecological Cytology | 15·00 € | RA00561 | Shoulder Ultrasound | 24·00 € |
| RA00248 | Computed Tomography of the chest without contrast | 110·00 € | RA01200 | Urinary Tract Ultrasound (Renal - Bladder) | 24·00 € |
| RA00047 | Lumbar-sacral spine X-ray 1-2 projections | 15·00 € | PD00041 | Non-Mydriatic Retinography | 93·00 € |
| PD00008 | Electromyography (EMG) of Lower Limbs | 100·00 € | PD00069 | Colonoscopy (Fibrocolonoscopy) with Sedation | 185·00 € |
| PD00046 | Photography of the Eye Fundus (Ophthalmoscopy) | 140·00 € | PD00093 | Forced Spirometry with Bronchodilator Test | 82·00 € |
| RA00002 | Chest X-ray >2 projection | 15·00 € | RA00090 | Foot X-ray >2 projections | 15·00 € |
| RA00041 | Cervical Spine X-ray 1-2 projections | 15·00 € | RA00428 | Soft Tissue Ultrasound | 24·00 € |
| RA00416 | Transthoracic Echocardiogram | 67·00 € | RA00020 | Face X-ray 1-2 projections | 15·00 € |
| RA00419 | Abdominal Ultrasound (Complete) | 72·00 € | RA00062 | Shoulder X-ray 1-2 projections | 15·00 € |
| RA00429 | Transvaginal Ultrasound | 36·00 € | RA00038 | Orthopantomography (Dental Panoramic Radiography) | 25·00 € |
| IQ44.13-1 | Fibrogastroscopy | 110·00 € | Others (median price) | | 40·00 € |

**Supplementary Table 2: Description of costs for each procedure**. Procedures were priced as per [14]. “Others” englobes procedures others than the ones listed (the most common used in the Unit population) and is a median price of such procedures.
